# Supplementary material for: Spatial specificity of auxin responses coordinates wood formation
Source: PubMed Central journal article supplement (PMC5830446; doi:10.1038/s41467-018-03256-2), 2018-02-28
Supplement: 41467_2018_3256_MOESM1_ESM.pdf [file 41467_2018_3256_MOESM1_ESM.pdf]

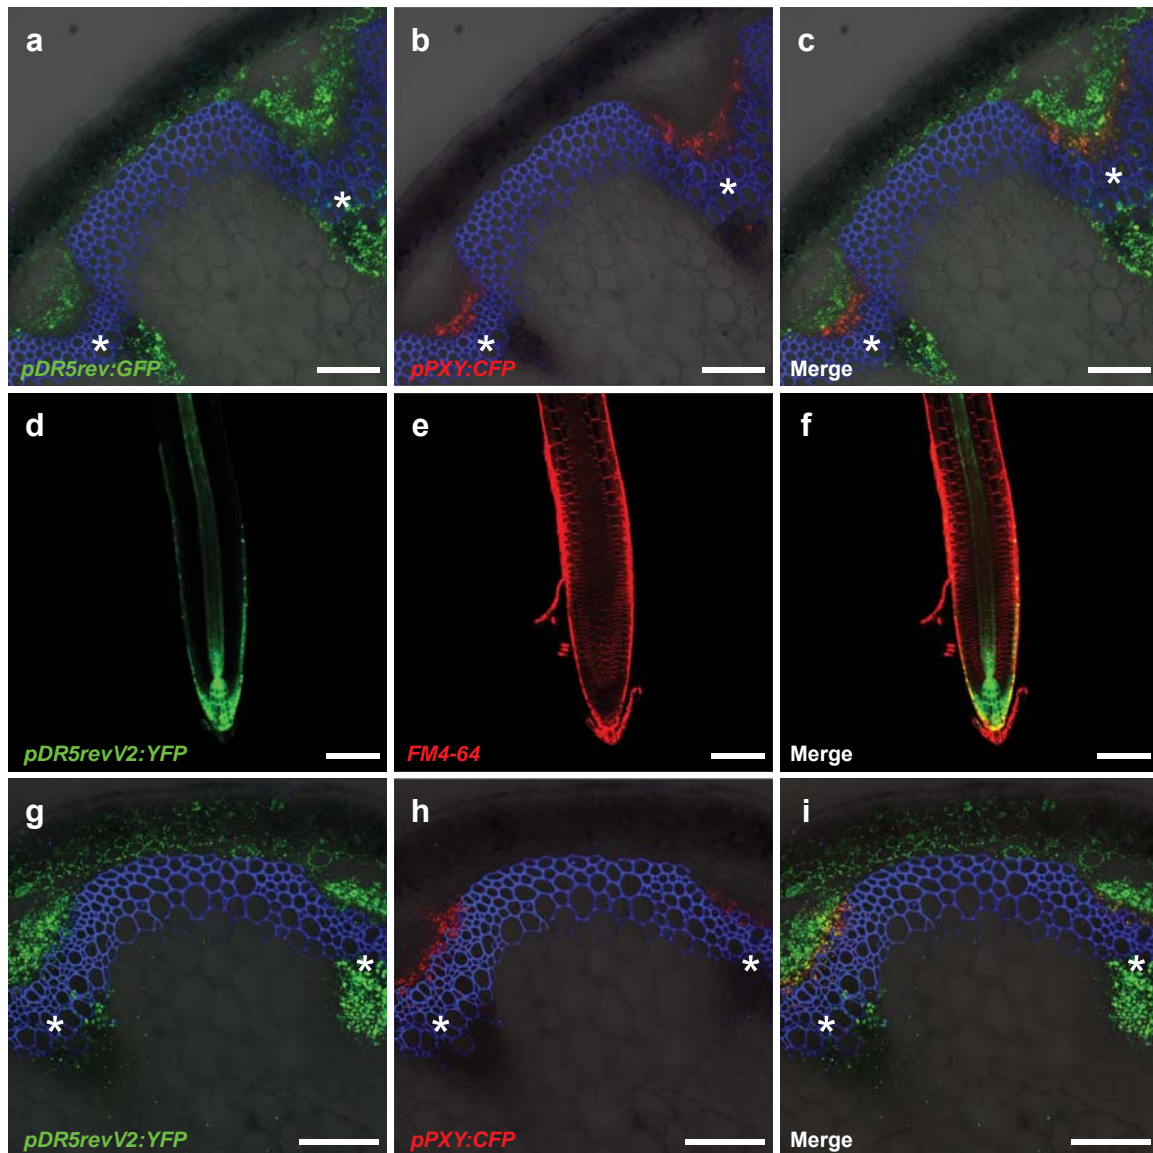

**Supplementary Figure 1:**

**a-c:** Confocal analyses of cross sections from the second internode (primary stem) of plants containing the auxin response markers *pDR5rev:GFP* and the stem cell marker *pPXY:CFP*. Asterisks mark the vascular bundles. Size bars represent 100  $\mu$ m. PI staining in blue.

**d-f:** Confocal analyses of root tips of 7-day-old seedlings carrying the *pDR5revV2:YFP* reporter. Size bars represent 100  $\mu$ m. FM4-64 staining in red.

**g-i:** Confocal analyses of cross sections from the second internode (primary stem) of plants containing the auxin response markers *pDR5revV2:YFP* and the stem cell marker *pPXY:CFP*. Asterisks mark the vascular bundles. Size bars represent 100  $\mu$ m. PI staining in blue.

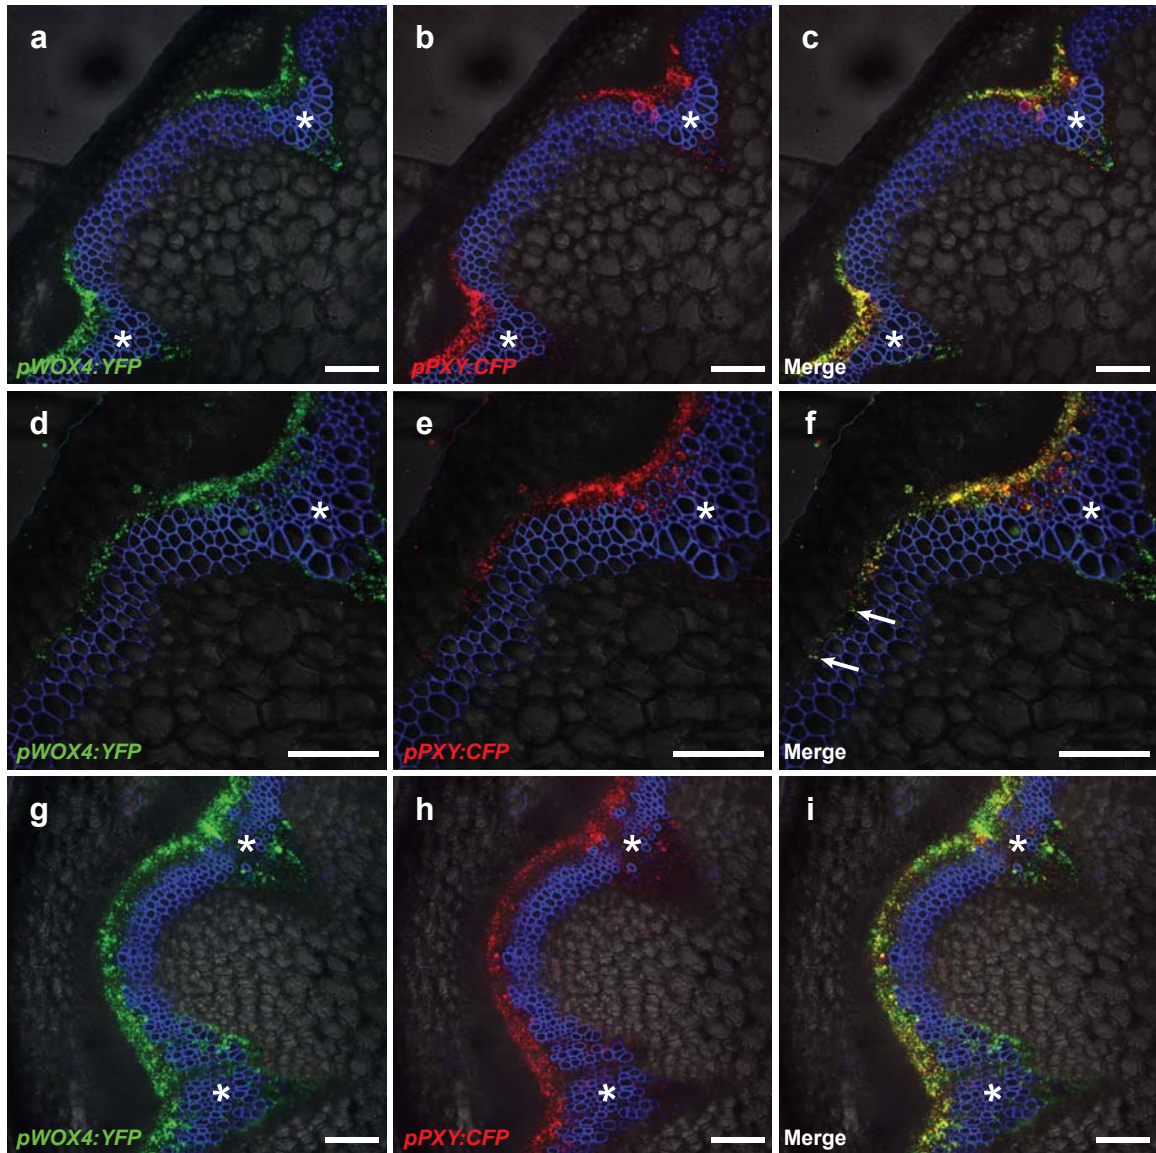

**Supplementary Figure 2:**

**a-i:** Confocal analyses of cross sections from the second internode (a-c), 5 mm above the stem base (d-f) and the stem base (g-i) of plants containing *pWOX4:YFP* and *pPXY:CFP*. Asterisks mark vascular bundles. Size bars represent 100  $\mu$ m. PI staining in blue.

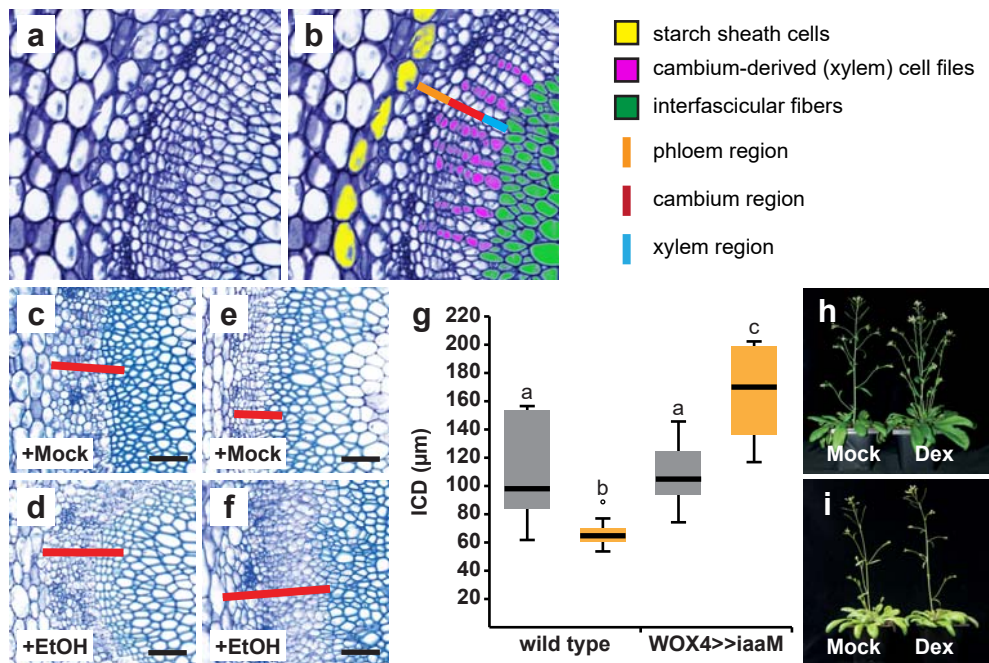

### Supplementary Figure 3:

**a,b:** Indication of the quantification strategy of the cambium width and the width of ICD tissues. The same section is shown without (a) and with (b) colour codings. The starch sheath (characteristic cells labelled in yellow), which is the innermost cell layer of the cortex, was used to define the outer boundary of the ICD tissues. The proximal end of cell files possible to identify along the cambium area were used to define the inner boundary of ICD tissues. Note that a combination of several cell files was taken into consideration in this case. Interfascicular fibers, which do not originate from the cambium, were identified based on their thicker cell wall and the fact that they are not organized in radial cell files. The cambium region was defined as the region with small and undifferentiated cells, the xylem as the tissue between cambium and interfascicular fiber cells and the phloem as the region between cambium and starch sheath cells.

**c-f:** Toluidine blue stained cross sections from the stem base of wild type (c, d) and *pWOX4:AlcR; palcA:iaaM* (e, f), plants after long-term EtOH (d, f) or mock (c, e) treatment. Interfascicular regions are shown and the whole of cambium and ICD tissues are marked (red bar). Size bars represent 50 µm.

**g:** Quantification of ICD tissue extension at the stem base of wild type and *pWOX4:AlcR; palcA:iaaM* (*WOX4>>iaaM*) plants after long-term EtOH (yellow), mock (light grey) treatment. Statistical groups indicated by letters were determined by one-way ANOVA with post hoc Tamhane-T2 (CI 95%, Sample size n=11-14).

**h,i:** Overview pictures of 15-20 cm tall *pPXY:Myc-GR-bdl* (h) and *pBDL:Myc-GR-bdl* (i) plants after long-term mock or Dex treatments, respectively.

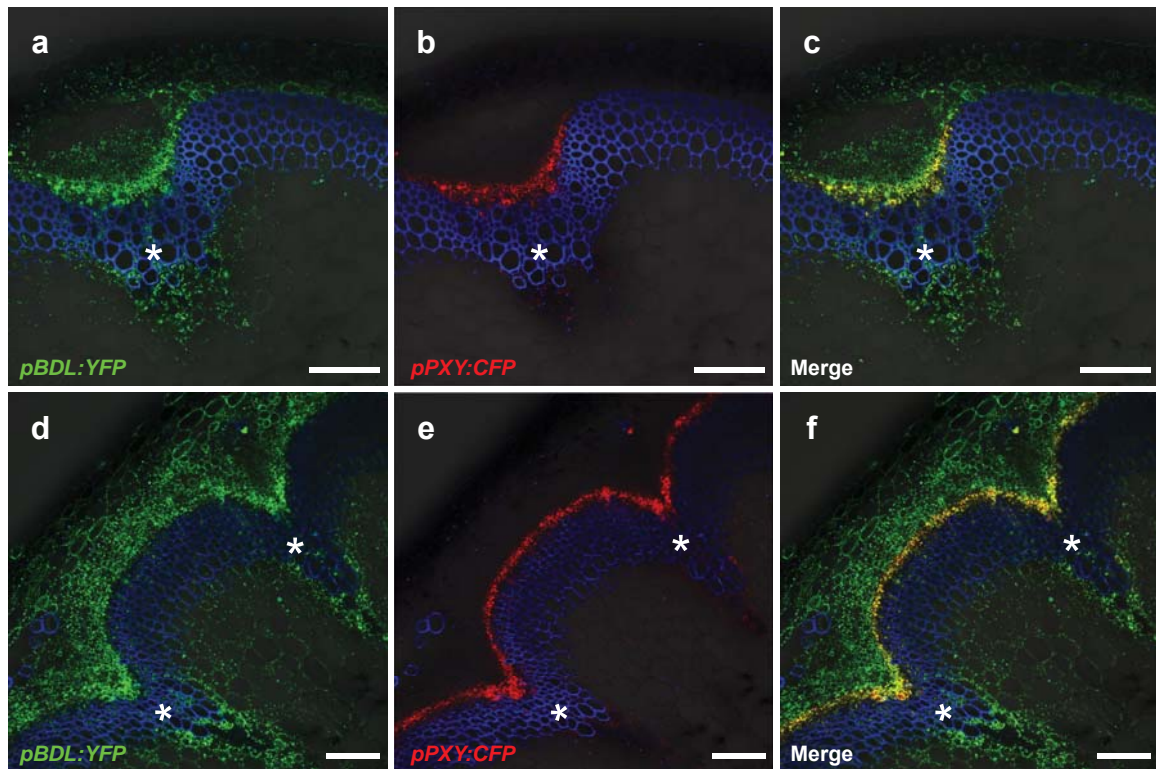

**Supplementary Figure 4:**

**a-f:** Confocal analyses of cross sections from the second internode (a-c) and stem base (d-f) of plants carrying *pBDL:YFP* and the stem cell marker *pPXY:CFP*. Asterisks mark vascular bundles. Size bars represent 100  $\mu$ m. PI staining in blue.

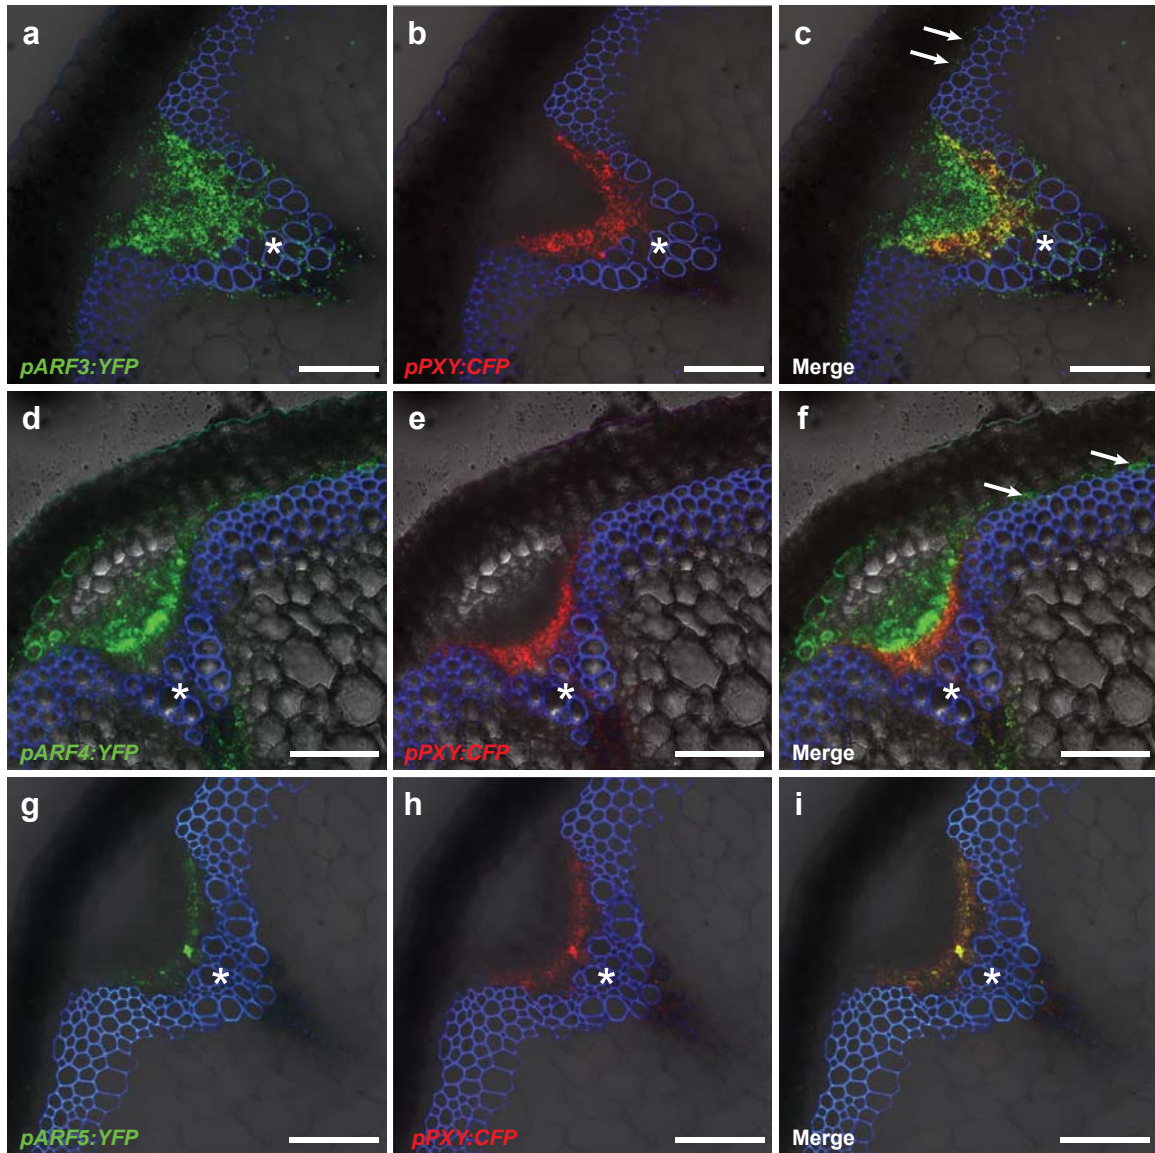

**Supplementary Figure 5:**

**a-i:** Confocal analyses of second internodes of plants containing *pARF3:YFP* (a-c), *pARF4:YFP* (d-f) and *pARF5:YFP* (g-i), respectively, and the stem cell marker *pPXY:CFP*. Arrows mark the expression of *pARF3:YFP* (c) and *pARF4:YFP* (f) in inter-fascicular region (starch sheath). Asterisks mark the vascular bundles. Scale bars represent 100 μm. PI staining in blue.

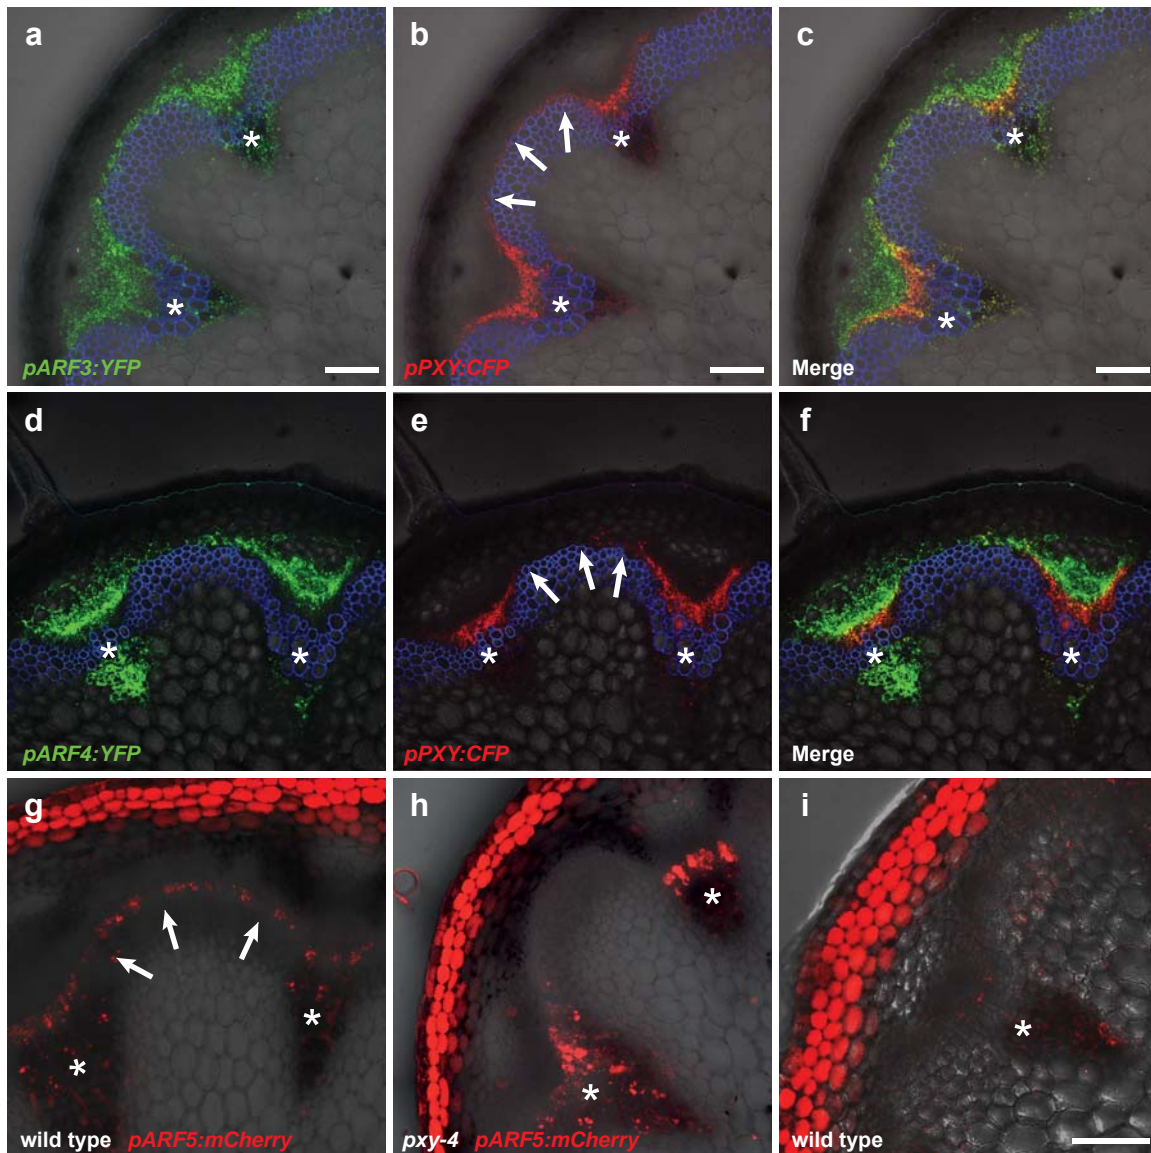

### Supplementary Figure 6:

**a-f:** Confocal analyses of cross sections 5 mm above the stem base (transition zone) of plants containing *pARF3:YFP* (a-c) and *pARF4:YFP* (d-f), respectively, and the stem cell marker *pPXY:CFP*. Arrows indicate *pPXY:CFP* activity in interfascicular regions. Asterisks mark the vascular bundles. Size bars represent 100  $\mu\text{m}$ . PI staining in blue.

**g-i:** Confocal analyses of cross sections at the stem base from wild type and *pxy-4* mutant plants containing the *pARF5:mCherry* reporter. Asterisks mark the vascular bundles. Arrows indicate *pARF5:mCherry* activity in interfascicular regions. i shows auto-fluorescence at the stem base of wild type plants imaged with the same settings as in g and h. Size bars represent 100  $\mu\text{m}$ .

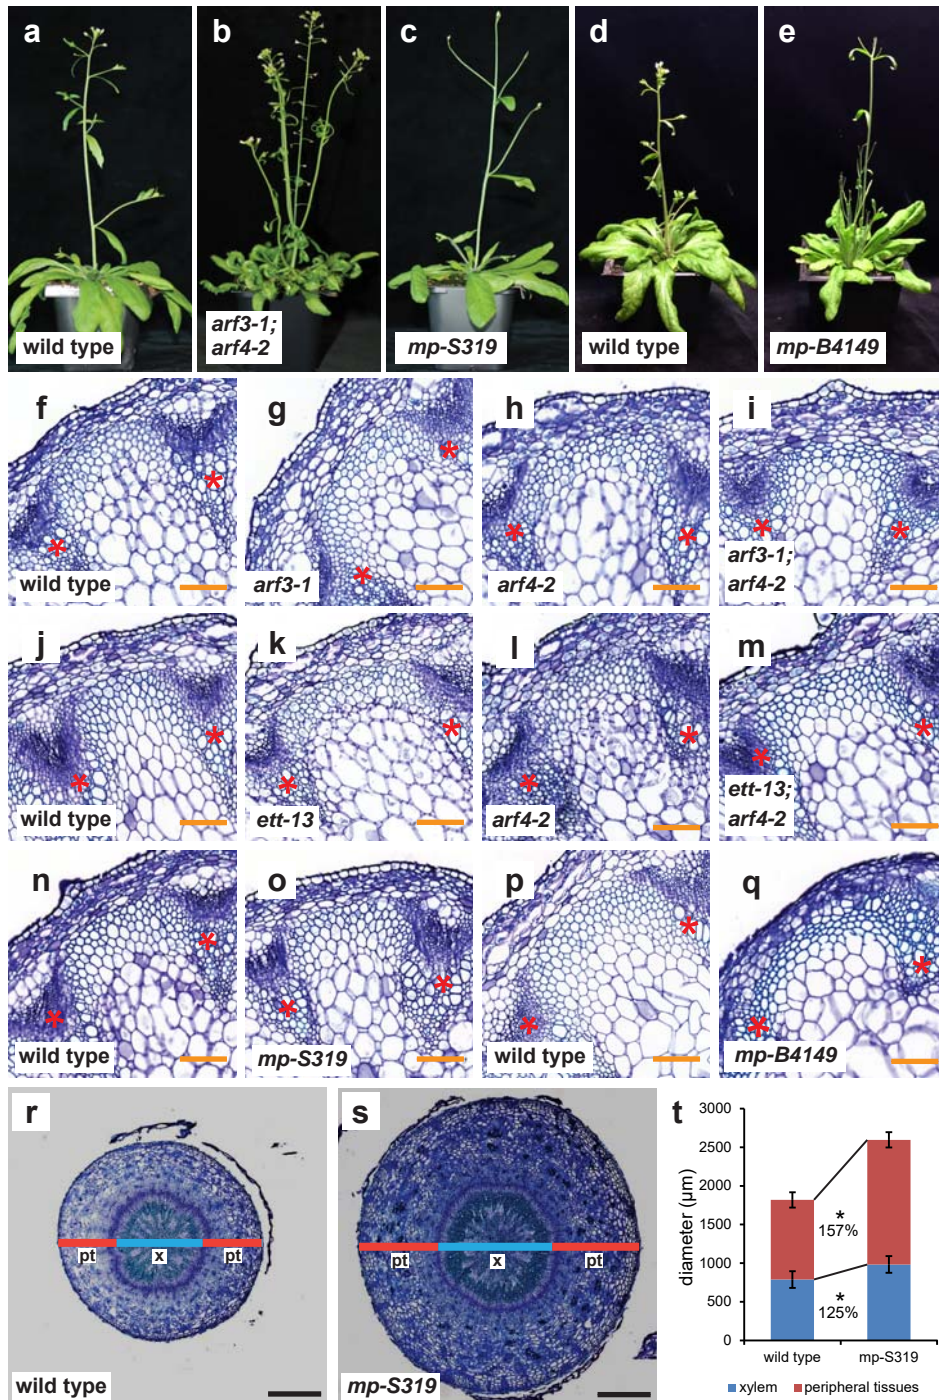

### Supplementary Figure 7:

**a-c:** Growth habitus of wild type, *arf3-1;arf4-2* and *mp-S319* mutants.

**d,e:** Growth habitus of wild type and *mp-B4149* after tissue culture-based rooting.

**f-m:** Primary stem conformation 9 mm above the stem base in *arf3* and *arf4* single and double mutants in comparison to wild type.

**n-q:** Primary stem conformation 9 mm above the stem base in *arf5* mutants in comparison to wild type.

**r-t:** Radial extension of wild type (r, t) and *mp-S319* hypocotyls (s, t). Student's T-test was performed comparing wild type and *mp-S319* (xylem:  $p=0.0001$ ; peripheral tissues:  $p=2.1E-11$ ) (Sample sizes:  $n=10-13$ ). Significance is indicated by asterisks. Size bars represent 100  $\mu\text{m}$  (f-q) and 500  $\mu\text{m}$  (r,s). Asterisks in f-q indicate primary vascular bundles. pt = peripheral tissues, x = xylem

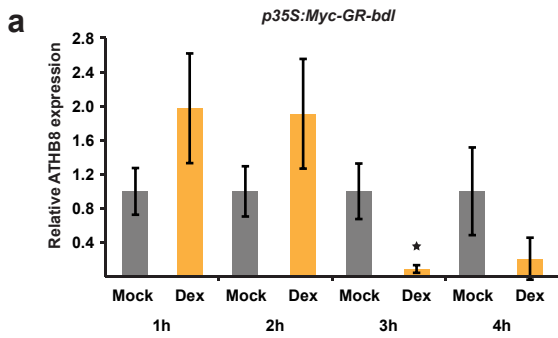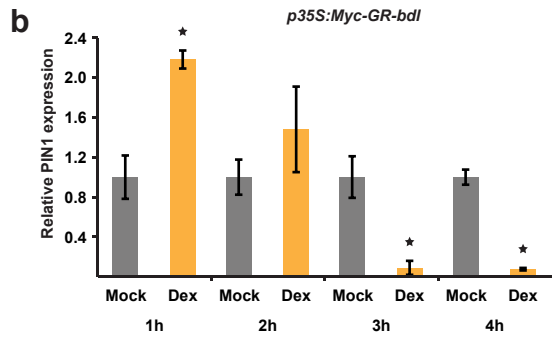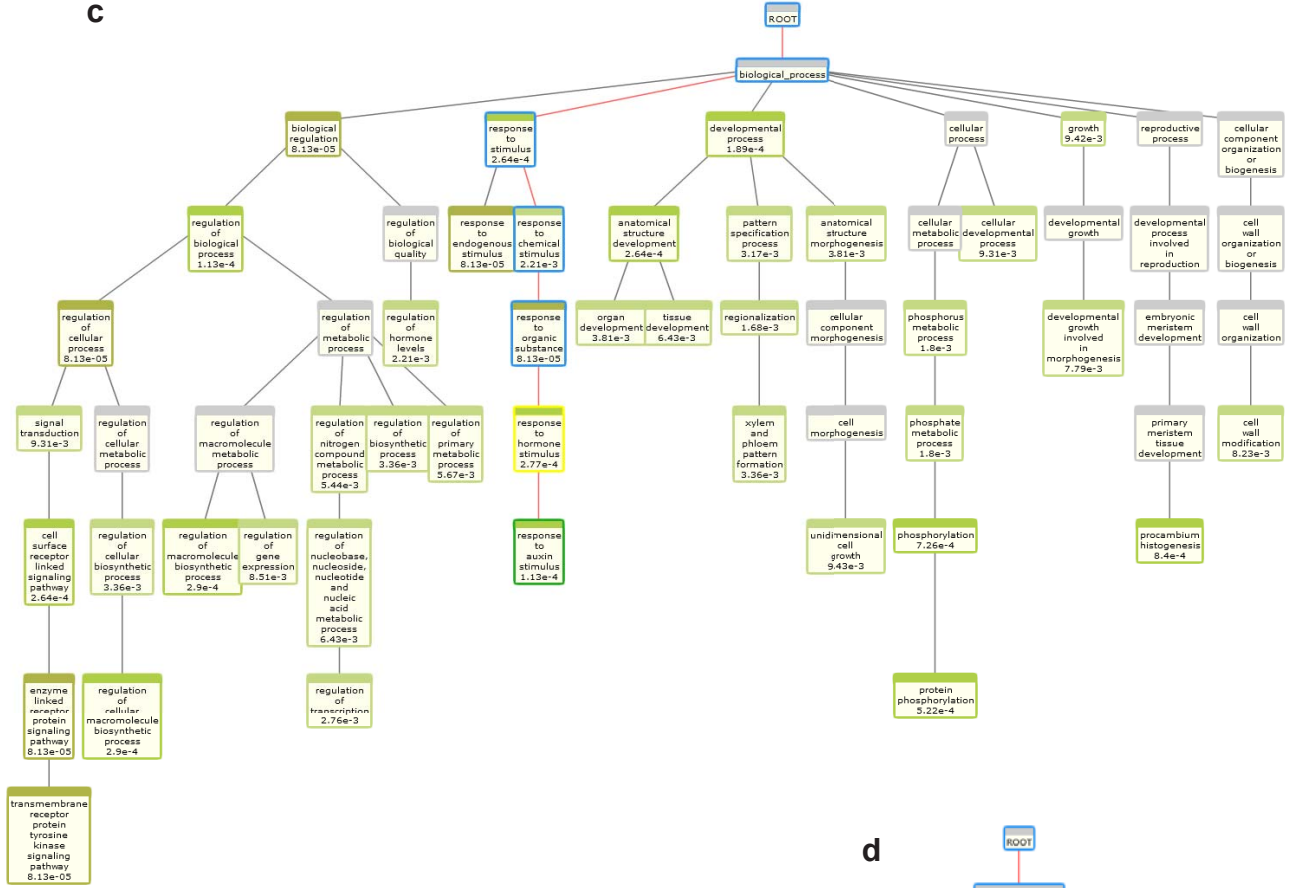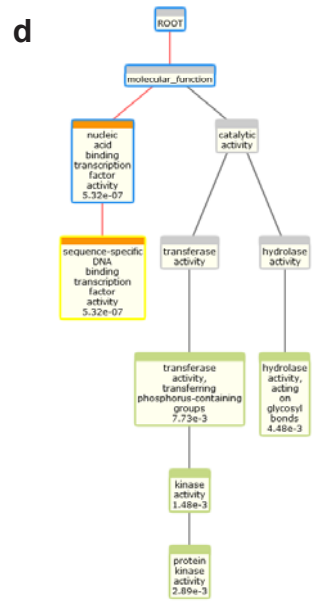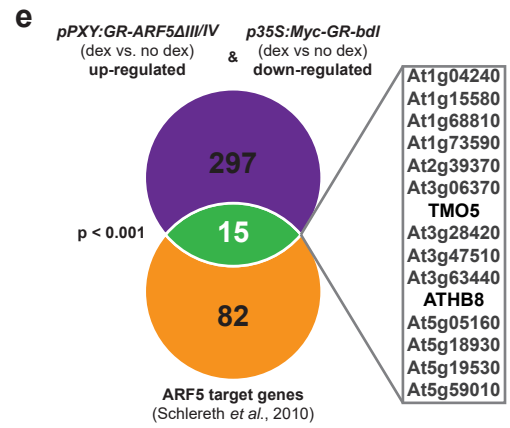



### Supplementary Figure 8:

**a,b:** Optimization of the duration of Dex treatment in the second internode of *p35S:Myc-GR-bdl* plants. Shown are the analyses of transcript levels of *ATHB8* (a) or *PIN1* (b) by quantitative RT-PCR. Error bars:  $\pm$  standard deviation. Student's T-test (*ATHB8* 1h p=0.07, 2h p=0.11, 3h p=8.69E-03, 4 h p=0.19 and *PIN1* 1h p=9.86E-04, 2h p=0.06, 3h p=4.98E-03, 4H p=5.03E-04) was performed comparing mock and Dex treated samples (Sample sizes n=2-3). Significance is indicated by the asterisk.

**c,d:** BioMaps analysis of biological process (c) and molecular function (d) of genes modulated by *p35S:Myc-GR-bdl* and *pPXY-GR-ARF5 $\Delta$ III/IV* induction (600 genes, p-value < 0.05, Supplementary Data 2) by Virtual Plant 1.3 with a cut-off p-value < 0.01 and the *Arabidopsis thaliana* Columbia (TAIR10) genome as background population.

**e:** Comparison of genes induced by *pPXY-GR-ARF5 $\Delta$ III/IV* and repressed by *p35S:Myc-GR-bdl* induction and a dataset of putative ARF5 target genes. Non-random degree of overlap was tested by using VirtualPlant 1.3 GeneSect with a cut-off p-value < 0.05 and the *Arabidopsis thaliana* Columbia (TAIR10) genome as background population.

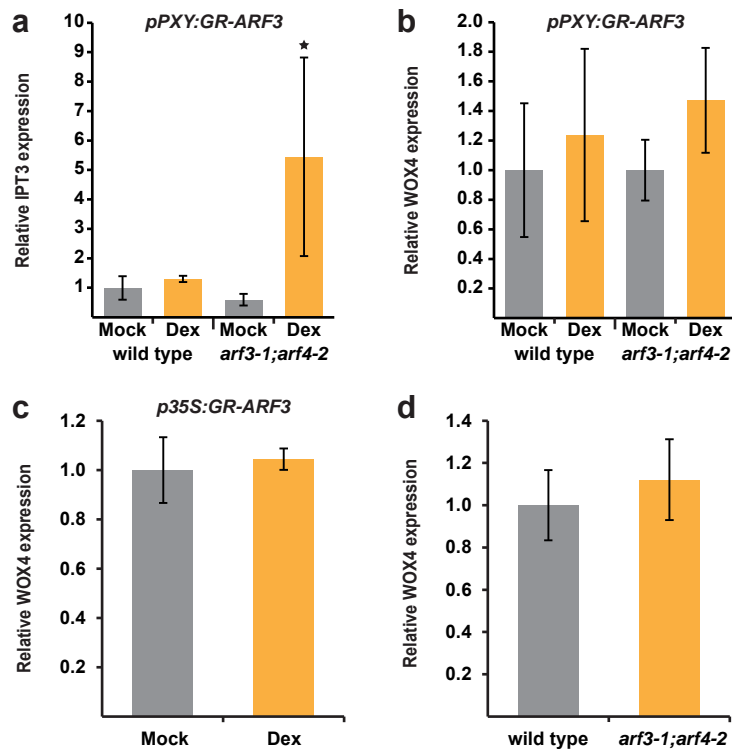

### Supplementary Fig. 9:

**a,b:** Analysis of *IPT3* (a) and *WOX4* (b) transcript levels by quantitative RT-PCR in the second internode of wild type and *arf3-1;arf4-2* mutant plants expressing *pPXY:GR-ARF3* after 3 hour mock (grey) or Dex (yellow) treatment.

**c:** Analysis of *WOX4* transcript levels by quantitative RT-PCR in the second internode of wild type plants expressing *p35S:GR-ARF3* after 3 hour mock (grey) or Dex (yellow) treatment.

**d:** Analysis of *WOX4* transcript levels by quantitative RT-PCR at the stem base of wild type and *arf3-1;arf4-2* mutant plants.

Error bars:  $\pm$  standard deviation. Student's T-test (*pPXY:GR-ARF3 IPT3*  $p=0.17$  & *WOX4*  $p=0.47$ , *pPXY:GR-ARF3;arf3-1;arf4-2 WOX4*  $p=0.17$ , *p35S:GR-ARF3 WOX4*  $p=0.61$ , wild type and *arf3-1;arf4-2 WOX4*  $p=0.45$ ) or Welch's T-test (*pPXY:GR-ARF3;arf3-1;arf4-2 IPT3*  $p=4.85E-02$ ) were performed comparing mock and Dex and wild type and mutant, respectively (Sample size  $n=3-4$ ). Significance is indicated by asterisk.

**a**

```
>chr1 17237952 17242053 - AT1G46480.1
tttggttcatttgggttttgggagcggattaaaacgtagaaactacg -2800
gtttcacaacaacttatttaattttaagtaaagagaaaaaactccttttctgaaactctgataaaaaaacaatcaattgcaatggtttatgttctc -2700
tgaataagaagtttagagtttggttcaaaaacaaacaaacctaaggcaaacctttggtcggttctcgatcagtcgatttatgatggaatttctattcaa -2600
catatgttctcttttctatttttctggccttgaatctcttatttttctatttttctgggtcctcaagattatccacctagatgtgtctcactcttttcat -2500
ttcctattgcaggtcaacgacgcttttatttaagctttttccatagaccgattaccattttatcagaattacttgattaatggaattattctcgattt -2400
aagtcgaaattttcgaagggtgctacatatctcatcaacaacaatacaaatcaaaggaaggaagaagagctaaagagctaaaaaaagatgaggaggag -2300
atcgaagtaacaatgggaagaaaagagatccaacaatgattgggtgtgaacatgttatgctagtttatttcaaattttgaaccctaaacctcaaac -2200
catcagtaatcTGTCAATtaCCGACAtagtattacatatggatcgaaaaataaacatgttaaatatgtgtcctaaaaaaatacatatgaacagtggttagag -2100
gcaagtgtagtgaggagggtcactgcatatgaatatcgacgatatagtatgggcatagataattgaagaaataacatctgcatcacagcttgacacac -2000
gaaatcaggttatccatcggtgatgacattttcaaaaaatagaatgggtattaccagtttctgttatgctttgggttcagtaaaagtccactcatttt -1900
ccagatctgatgaatgatagagcagctttttagaactttgagcttcatattctcctccgtccaacaaagatgaattttctatggaaaaaattgtccc -1800
acaaagatacaaaatttgtatttttaataataaaattttaaaatgtttacctgtttatcctaagtaaataagtagataaatattttttattttttaa -1700
atatattaaaagggtaaaattgtcagtatacattatttttaaaatgtgaaatttctataaaaaaatccatcttcataggataaagatgttattaattt -1600
tagctattagtcagatcaacctacactggacttctatatttctccatgatatacaatttttatgttttaaccagtgatagaactgtgactttccacc -1500
ttcaactcttgatccatataatattagtgtaagtttctgactgtacataactggatttagccgagactaaataattttgactattc -1400
ttcacagttcactcaaggctctctgttctttgtaattctagactacatatcaataaaaaagatgatgatataatagtcacaaactcaaaagtaattagaa -1300
gaaaaaactttgtaattccggaatatacactgacttcttctcattagtaaaatacccaaatcttgggaaattgaggttctgcagttcccgatgtac -1200
aagagaataacaatacaatacactgatcctaaagtgaatgggagccttgacattgccaaccaaaccatgcttttgatcaatatctaataaacatataag -1100
cttaaaattataatgatgtattattcaaaaataacaatgataataaacattaagatattctagccttttcttttccgcataaaaagtctgtcctggc -1000
tcattataaactaccactaatttaggcaaaatccgatcttaacaaaagtaaaaaagcaatttctgagtatgggattggaagataccttttcccttat -900
tcattctctctcattctctcttctctcaataaaagtagttgagacttgagaccacgaaaagcatttcgacatcctatcattaagctaaccttttttc -800
agtgttttatttcaaaaataatttcttaaaataaagaagggtgagagagaaatattgtccctatacaactagtagaatgaaagattgtcaagctttggtt -700
tgggatttttcaataaacacatgcatttgttagaatttgatccccaaaaaaaaaaattcaaaccttttctgtgtaaaagcaaacctattggctcgtag -600
gtcaatgtcaatcctcaatgaatagtaagcttttgatatacagatctataacatatttttttagcgtggtcattgtccctcaacattctgcctaaat -500
tataggatctcaagacatagtagtactatagactacaactacaagtagagggaaaattttataagagagataaattatgcggtattcacgcatgacatgcgtaa -400
gcatgaaactaaaatgggtgatacattactatgccgaatttaagtagtgctccatgCAGACAgaacatatacagatatacacacgtacgcatgtatta -300
cgtgatgtagagacacacgtacgcatatctatattcacacaatgagatttcaactttctcaacaaagatcactgtcttcaattagtttcaaaattgttc -200
ttacctattgcttttacatttctgagtgatataattacaataaggacaaggagattttaaatagataaaagtcaaccatataccatcatttgggtotttg -100
gtttcccgacgtccacttttgaaaaaatcatctgttcattttccattcttttcttttcttaccactggatataccaatgatatacattatacact +1
aacactatcatttcacacttatctctctatatacatagcttaagtcttgtaacgagaaaggcatgcatagcatttgctagttttaaacaatagcaATG
```

**b**

| Matrix for ARF binding sites prediction    | Position relative TSS |                  |
|--------------------------------------------|-----------------------|------------------|
|                                            | -2175                 | -335             |
| M0147_1.02 (see ref. <sup>77</sup> )       | p-value < 0.0002      | p-value < 0.0008 |
| ARF_ARF2_col_v31 (see ref. <sup>78</sup> ) | p-value < 7e-05       | p-value < 0.0002 |
| ARF_ecoli_MP_col (see ref. <sup>78</sup> ) | p-value < 0.0002      | p-value < 0.0002 |

**Supplementary Fig. 10:**

**a:** 3000 bp upstream of the *WOX4* start codon used for ARF binding site prediction. Identified sites are highlighted in yellow. The transcriptional start site (TSS) is indicated by +1.

**b:** The significances (p-values) of top-scored potential ARF binding sites located upstream of the start codon of the *WOX4* gene. The first column lists the frequency matrices that were used for ARF binding site prediction (see Methods). The other columns show the significances of potential hits estimated by p-values in relation to the score of the matrix.

**Supplementary Table 1. Oligonucleotides used in this study**

| Oligo Name        | Sequence (5'-3')                                |
|-------------------|-------------------------------------------------|
| <b>Genotyping</b> |                                                 |
| SAIL_1211_F06_LP  | ATGAAGTTTGACCAGCTTGCC                           |
| SAIL_1211_F06_RP  | GGGGATTTTGATTCGTAGGC                            |
| SALK_040513_LP    | AACGGTAGTCCAAATCTTCGC                           |
| SALK_040513_RP    | TCAGAAAAACAGAACAAAACCC                          |
| SALK_070506_LP    | GGAGTCTGTGACTTGGACCC                            |
| SALK_070506_RP    | TCATCATACCCGTTAAGTCGC                           |
| SALK_021319_LP    | TCTTCTTCCAGTCTCTTGCC                            |
| SALK_021319_RP    | TTAAGATCGTTAATGCCTGCG                           |
| MP_for8           | TCGGTGTCTTGCTGCTG                               |
| MP_rev8           | GGATGGAGCTGACGTTTG                              |
| Gabi_462G01_LP    | TTTTTAGCGTGGTTCATGTCC                           |
| Gabi_462G01_RP    | CATTTTTCCCTTCGATTTTCC                           |
| PXYfor7           | TTTCCCTCGACCTCTCTCAC                            |
| PXYrev7           | CCGTTCTCTTTGTTTTTCCCC                           |
| <b>Promoters</b>  |                                                 |
| WOX411for         | ACTAGCGGCCGCTTTGGTTCATTTGTTTTGGGA               |
| WOX4rev9          | ACTAGCTAGCTATATGTTAAACTAGCAAATGC                |
| At4g24550_for1    | ACTAGGATCCTGTTTTAGATAATGTTTATCCTTC              |
| At4g24550_rev1    | ACTACTCGAGATCGTTGCACCTTTATTTTC                  |
| BDL_for2          | ACTAGCGGCCGCCATGTGGTAGTGTCG                     |
| BDL_rev4          | TCTAGATACCATGGTCAATAACAAAACCTAGACTCC            |
| BDL_for3          | ACTACCCGGGCTTCCCTTCCAAAGC                       |
| BDL_rev5          | ACTAGGTACCTTTCTAGGTAACAAGTTAAATATTACCTAAACAATCC |
| ARF3for1          | ACTAGCGGCCGCGTCATTACCATTAAAGTCATC               |
| ARF3rev1          | ACTAGGATCCATCCATGGTAAAGAGAGAGAAACAGAGATAAAG     |
| ARF3for2          | ACTAGGATCCATCTGCAGAAGGGTTCTTTGGTTTCTGTG         |
| ARF3rev2          | ACTAGGTACCCATTGGCTTGGATTACGTTTTTC               |
| ARF4for1          | ACTAGCGGCCGCACACCAACTCTGTTCAACTCT               |
| ARF4rev1          | ATCAACTAGTTGAAAAAGCTTCTCTTTTAAGAG               |
| ARF4for2          | ACTACCCGGGTACCCATAAAGAAGCTTATTTTC               |
| ARF4rev2          | ACTAGGTACCACAGATATTGTGAAATATTCC                 |
| MP_for7           | ACTAGCGGCCGCAGATCATCTTGAACGGTAATCG              |
| MP_rev5           | ACTAGGATCCTACATATGACAGAGAGATTTTTCAATGTTTC       |
| MP_for5           | ACTAGGATCCTACTCGAGATGTAACAATATAAAAATGATC        |
| MP_rev6           | ACTAGGGCCCTGCAGAATTAGCATAACCACACATGC            |
| AT4G32880_for_2   | GGGAACAAAAGCTGGAAACGGTAGGAAATAGATTACACAGA       |
| AT4G32880_rev_2   | GGCCCGGGATCCATGCTTTGATCCTCTCCGATCTCTC           |
| RULfor2           | ACTACTCGAGGGATTTCAATAATCTAAATGG                 |
| RULrev2           | ACTAGAATTCATCATATGGGTTGAGCTATTTGGTGACTION       |
| RULfor3           | ACTAACTAGTTTCTCATTCCGACCAAAAAG                  |
| RULrev3           | ACTAGCGGCCGCATATTTTTTTGTTTCTGTAG                |

| <b>ORFs</b>  |                                                                                       |
|--------------|---------------------------------------------------------------------------------------|
| Myc_for1     | ACTATCTAGAATGGGGGAGCAAAAGCTTATTTCTG                                                   |
| BDL_rev3     | ACTAGGATCCTAAATAGGGTTGTTTCTTTGTCTATCC                                                 |
| Myc_for5     | ACTATCATGATAGAGCAAAAGCTTATTTCTGAGGAGG                                                 |
| BDL_rev7     | ACTACCCGGGGATCCTAAATAGGGTTG                                                           |
| GR_for1      | ACTATCTAGAATGATTCAGCAAGCCACTGCAGG                                                     |
| GR_rev3      | ACTACCCGGGTAGTCGACTTTTTGATGAAACAGAAGC                                                 |
| ARF3_for4    | ACTAGTCGACATGGGTGGTTAATCGATCTG                                                        |
| ARF3_rev4    | ACTACCCGGGCTAGAGAGCAATGTCTAGC                                                         |
| MP_for16     | ACTAGTCGACATGATGGCTTCATTGTCTTGTG                                                      |
| MP_rev14     | ACTAGAATTCTTATGAAACAGAAGCTTAAGATCGTTAATGCC                                            |
| GR_for5      | ACTATCATGATTCAGCAAGCCACTGCAGGAGTCTC                                                   |
| MP_for18     | ACTAACATGTTTCAGCAAGCCACTGCAGGAGTCTCAC                                                 |
| MP_rev16     | ACTACCCGGGTAGCTTGAAGATGTACCAGTGCCTCC                                                  |
| malE_fw2     | CGAGCAATTGACCAACAAGGACCATAGATTATGAAAATCCATCACCATCAC<br>CATCACGAAGAAGGTAAACTGGTAATCTGG |
| malE_rv1     | CAGCAGATCTTTGTTATAAATCAG                                                              |
| ARF5-DBD_fw1 | CACCCCATGGGGGACAGTGACGAAATCTATGCTC                                                    |
| ARF5-DBD_rv1 | GGTGCTCGAGTTAATCCGCTGAGAGAACTGATG                                                     |

| <b>Mutagenesis</b> |                                     |
|--------------------|-------------------------------------|
| NOS-mut_for1       | GCCGAGTCAACCGTGTACGTCTCCCCCGCC      |
| NOS-mut_rev1       | CGTACACGGTTGACTCGGCCGTCCAGTCGTAGGCG |

| <b>qRT-PCR</b> |                          |
|----------------|--------------------------|
| AtHB8for6      | TCCAAATCAGAGGGGTTGAG     |
| AtHB8rev6      | CGACGCGATCACACTTCTTA     |
| WOX4 qPCR F    | CCTCCGGCGTCACTTCAG       |
| WOX4 qPCR R    | GGGTTCCACCTTGTCCCTC      |
| PIN1for7       | TGTTACTGTTCGTCGTTCTAATGC |
| PIN1rev7       | ACCACCAGAAGCCATCATCG     |
| EIF4A1for      | ATCCAAGTTGGTGTGTTCTCC    |
| EIF4A1rev      | GAGTGTCTCGAGCTTCCACTC    |
| qACT2f         | GCCATCCAAGCTGTTCTCTC     |
| qACT2r         | ACCCTCGTAGATTGGCACAG     |

| <b>EMSA probes</b> |                                                                            |
|--------------------|----------------------------------------------------------------------------|
| PIN1_fw            | TCAAATAAAGACAAAAGCTCT                                                      |
| PIN1_rv            | AGAGCTTTTGTCTTTAGTTTGA                                                     |
| STG_fw             | GCCGACAAAAAGTAATAAATTTGTAATTATTAGATGTAAGACAGGAG<br>ATGAGATAGGGAGACAAGAG    |
| STG_rv             | CTCTTGTCTCCCTATCTCATCTCCTGTCTTACATCTAATAATTACAAATTAT<br>TAGTTACTTTTTGTGGCC |
| WOX4a_fw           | GCTCCATGCAGACATGAACATA                                                     |
| WOX4a_rv           | TATGTTTCATGTCTGCATGGAGC                                                    |
| WOX4a_mut_fw       | GCTCCATGCAGCCATGAACATA                                                     |
| WOX4a_mut_rv       | TATGTTTCATGGCTGCATGGAGC                                                    |
| WOX4b_fw           | AATCTGTCATTACCGACATAGT                                                     |
| WOX4b_rv           | ACTATGTCGGTAATGACAGATT                                                     |
| CLV1_fw            | CATCGTCGTCACGTGATGGG                                                       |
| CLV1_rv            | CCCATCACGTGACGACGATG                                                       |
