# Supplementary material for: Spatial specificity of auxin responses coordinates wood formation
Source: PubMed Central journal article supplement (PMC5830446; doi:10.1038/s41467-018-03256-2), 2018-02-28
Supplement: 41467_2018_3256_MOESM3_ESM.pdf [file 41467_2018_3256_MOESM3_ESM.pdf]

### **Description of Supplementary Files**

File Name: Supplementary Data 1

Description: Genes responding to auxin signaling in the cambium.

File Name: Supplementary Data 2

Description: GO terms and categories of identified genes.
